# Supplementary material for: Crystal structure prediction by combining graph network and Bayesian optimization
Source: Research Square preprint supplement (doi:10.21203/rs.3.rs-814684/v1), 2021-08-20
Supplement: Supplementary file 1 [file 3a9f4749abfed9e45dc6252b.docx]

Supplementary Materials: Crystal structure prediction via combining graph network and Bayesian optimization

Guanjian Cheng1, Xin-Gao Gong2,3, Wan-Jian Yin1,4,5

1College of Energy, Soochow Institute for Energy and Materials InnovationS (SIEMIS), and Jiangsu Provincial Key Laboratory for Advanced Carbon Materials and Wearable Energy Technologies, Soochow University, Suzhou 215006, China

2Key Laboratory for Computational Physical Sciences (MOE), State Key Laboratory of Surface Physics, Department of Physics, Fudan University, Shanghai 200433, China

3Shanghai Qi Zhi Institute, Shanghai, 200232, China

4Light Industry Insititute of Electrochemical Power Sources, Soochow University, Suzhou 215006, China

5Key Lab of Advanced Optical Manufacturing Technologies of Jiangsu Province & Key Lab of Modern Optical Technologies of Education Ministry of China, Soochow University, Suzhou 215006, China

Table S1: Twenty-three atomic features **C**.

| # | Property | Unit |
| --- | --- | --- |
| 1 | Atomic number | - |
| 2 | Group number | - |
| 3 | Period number | - |
| 4 | atomic mass | - |
| 5 | density | g/cm3 |
| 6 | volume | cm3/mol |
| 7 | atomic radii | pm |
| 8 | van der Waals radii | pm |
| 9 | covalent radii | pm |
| 10 | melt | K |
| 11 | boil | K |
| 12 | specific heat | J∙g-1∙K-1 |
| 13 | Pauling electronegativity | - |
| 14 | first ionization energy | eV |
| 15 | dipole polarizability | a. u. |
| 16-19 | the number of outer shell electrons in s, p, d, f orbitals | - |
| 20 | element valence state | - |
| 21 | the number of valence electrons in POTCAR | - |
| 22 | LDAUU | - |
| 23 | MAGMOM | - |

Table S2: Six cell feature **L**

| # | Property | Unit |
| --- | --- | --- |
| 1-3 | *a*, *b*, *c* | Å |
| 4-6 | *α*, *β*, *γ* | Degree |

Table S3: Four lattice features derived from atomic coordinates {**R**i} and cell feature **L**

| # | Property | Unit |
| --- | --- | --- |
| 1 | Atom spatial distance | Å |
| 2 | Area of the Voronoi polyhedron | Å2 |
| 3 | Volume of the Voronoi polyhedron | Å3 |
| 4 | Solid angle of the Voronoi polyhedron | Sterradian |

**Figure** S2. GN-predicted formation enthalpies and DFT-calculated total energies for random CaS structure in every 50 RAS steps. The DFT-calculated total energies are realigned for eye-guding comparisons.

**Figure** S3. The process of GN-BOSS approach to search the crystal structure of CaS. Typical structures derived from GN-BOSS process are shown in (b-h). This is an extension of searching step from 7500 (Figure 3) to 20000, to show the tiny structural refinement from (e) to (h).

| **#** | **Prototype structure** | **Relaxed structure** | **#** | **Prototype structure** | **Relaxed structure** |
| --- | --- | --- | --- | --- | --- |
| 1 | 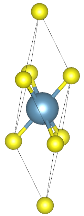  166 [] | 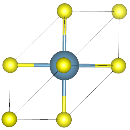  225 [] | 2 | 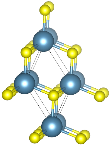  216 [] | 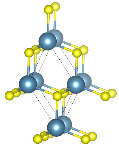  216 [] |
| 3 | 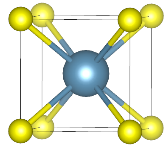  221 [] | 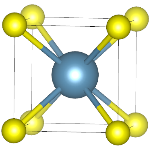  221 [] | 4 | 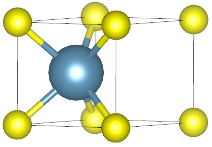  187 [] | 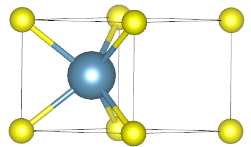  187 [] |
| 5 | 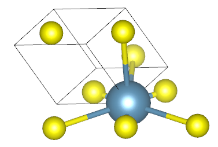  160 [] | 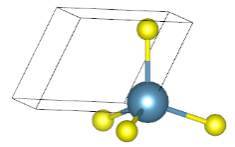  216 [] | 6 | 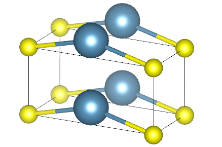  25 [] | 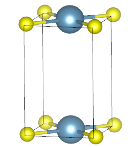  25 [] |
| 7 | 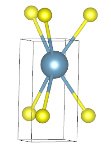  187 [] | 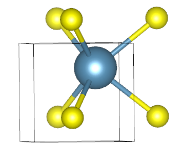  187 [] | 8 | 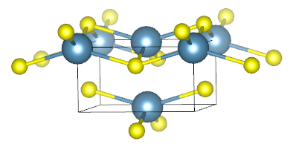  59 [] | 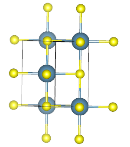  225 [] |
| 9 | 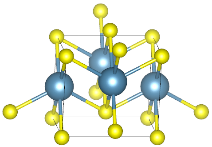  59 [] | 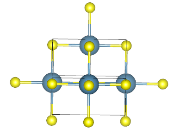  225 [] | 10 | 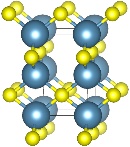  131 [] | 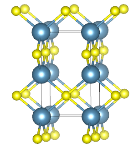  131 [] |
| 11 | 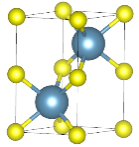  194 [] | 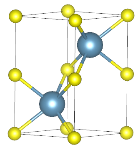  194 [] | 12 | 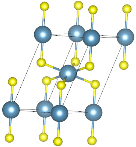  166 [*R*] | 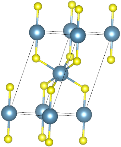  166 [*R*] |
| 13 | 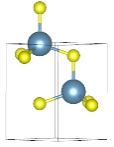  186 [] | 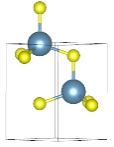  186 [] | 14 | 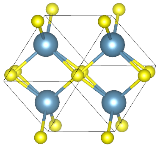  71 [] | 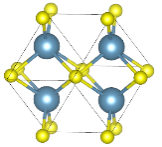  71 [] |
| 15 | 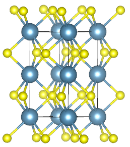  194 [] | 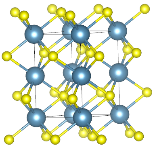  194 [] | 16 | 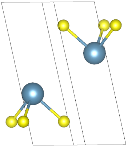  166 [*R*] | 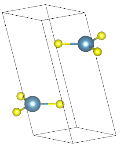  166 [*R*] |
| 17 | 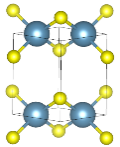  129 [] | 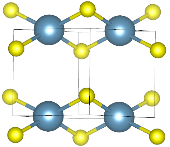  129 [] | 18 | 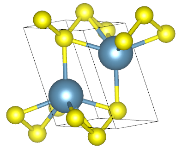  63 [] | 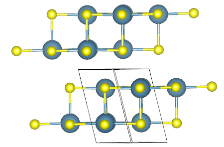  63 [] |

**Figure** S4: Eighteen AB prototype structures with their group number and index for CaS before and after DFT relaxation. The marked red boxes are RS structure.

**Figure** S5. The process of GN-RAS (4 atoms), GN-BO (4 atoms), GN-PSO (4 atoms) and GN-BO-SYM (8 atoms) approaches to search the crystal structures of LiF, NaF, KF, and RbF. Absolute values of ∆H’s for four approaches have been shifted to guide eyes. Lowest-energy structures within 10,000 steps for each approach have been shown at right side.

**Figure** S6. The process of GN-RAS (4 atoms), GN-BO (4 atoms), GN-PSO (4 atoms) and GN-BO-SYM (8 atoms) approaches to search the crystal structures of CsF, LiCl, NaCl, and KCl. Absolute values of ∆H’s for four approaches have been shifted to guide eyes. Lowest-energy structures within 10,000 steps for each approach have been shown at right side.

**Figure** S7. The process of GN-RAS (4 atoms), GN-BO (4 atoms), GN-PSO (4 atoms) and GN-BO-SYM (8 atoms) approaches to search the crystal structures of RbCl, CsCl, BeO, and MgO. Absolute values of ∆H’s for four approaches have been shifted to guide eyes. Lowest-energy structures within 10,000 steps for each approach have been shown at right side.

**Figure** S8. The process of GN-RAS (4 atoms), GN-BO (4 atoms), GN-PSO (4 atoms) and GN-BO-SYM (8 atoms) approaches to search the crystal structures of CaO, SrO, BaO, and ZnO. Absolute values of ∆H’s for four approaches have been shifted to guide eyes. Lowest-energy structures within 10,000 steps for each approach have been shown at right side.

**Figure** S9. The process of GN-RAS (4 atoms), GN-BO (4 atoms), GN-PSO (4 atoms) and GN-BO-SYM (8 atoms) approaches to search the crystal structures of CdO, BeS, MgS, and CaS. Absolute values of ∆H’s for four approaches have been shifted to guide eyes. Lowest-energy structures within 10,000 steps for each approach have been shown at right side.

**Figure** S10. The process of GN-RAS (4 atoms), GN-BO (4 atoms), GN-PSO (4 atoms) and GN-BO-SYM (8 atoms) approaches to search the crystal structures of SrS, BaS, ZnS, and CdS. Absolute values of ∆H’s for four approaches have been shifted to guide eyes. Lowest-energy structures within 10,000 steps for each approach have been shown at right side.

**Figure** S11. The process of GN-BO-SYM (8 atoms) and DFT-PSO-SYM (8 atoms) approaches to search the crystal structures of C.

**Figure** S12. The process of GN-BO-SYM (8 atoms) and DFT-PSO-SYM (8 atoms) approaches to search the crystal structures of Si.

**Figure** S13. The process of GN-BO-SYM (5 atoms) and DFT-PSO-SYM (5 atoms) approaches to search the crystal structures of CsPbI3.

**Figure** S14. The process of GN-BO-SYM (10 atoms) and DFT-PSO-SYM (10 atoms) approaches to search the crystal structures of CsPbI3.
